# Supplementary material
Source: PubMed Central journal article supplement (PMC5790205)

Supplement Table 1: Plasma apolipoprotein C-III proteoforms identified by mass spectrometric immunoassay

| <b>ApoC-III proteoform</b>                                                                                                                                                                            |                                                                                  | <b>Theoretical m/z value</b> | <b>Observed m/z value</b> |
|-------------------------------------------------------------------------------------------------------------------------------------------------------------------------------------------------------|----------------------------------------------------------------------------------|------------------------------|---------------------------|
| ApoC-III <sub>0a</sub>                                                                                                                                                                                | ApoC-III native                                                                  | 8764.652                     | 8764.585                  |
| ApoC-III <sub>0b</sub>                                                                                                                                                                                | ApoC-III + (Gal) <sub>1</sub> (GalNAc) <sub>1</sub>                              | 9135.800                     | 9135.494                  |
| des-A apoC-III <sub>1</sub>                                                                                                                                                                           | ApoC-III + (Gal) <sub>1</sub> (GalNAc) <sub>1</sub> (NeuAc) <sub>1</sub> des-Ala | 9350.171                     | 9349.854                  |
| ApoC-III <sub>1</sub>                                                                                                                                                                                 | ApoC-III + (Gal) <sub>1</sub> (GalNAc) <sub>1</sub> (NeuAc) <sub>1</sub>         | 9422.249                     | 9421.966                  |
| des-A apoC-III <sub>2</sub>                                                                                                                                                                           | ApoC-III + (Gal) <sub>1</sub> (GalNAc) <sub>1</sub> (NeuAc) <sub>2</sub> des-Ala | 9641.429                     | 9641.895                  |
| ApoC-III <sub>2</sub>                                                                                                                                                                                 | ApoC-III + (Gal) <sub>1</sub> (GalNAc) <sub>1</sub> (NeuAc) <sub>2</sub>         | 9712.507                     | 9712.862                  |
| ApoC-III var 4                                                                                                                                                                                        | ApoC-III + (Gal) <sub>2</sub> (GalNAc) <sub>2</sub> (Fuc) <sub>3</sub>           | 9933.768                     | 9933.482                  |
| ApoC-III var 5                                                                                                                                                                                        | ApoC-III + (Gal) <sub>3</sub> (GalNAc) <sub>3</sub> (Fuc) <sub>2</sub>           | 10152.961                    | 10152.745                 |
| ApoC-III var 6                                                                                                                                                                                        | ApoC-III + (Gal) <sub>4</sub> (GalNAc) <sub>2</sub> (Fuc) <sub>3</sub>           | 10258.056                    | 10257.989                 |
| ApoC-III var 7                                                                                                                                                                                        | ApoC-III + (Gal) <sub>2</sub> (GalNAc) <sub>4</sub> (Fuc) <sub>3</sub>           | 10340.158                    | 10341.426                 |
| ApoC-III var 8                                                                                                                                                                                        | ApoC-III + (Gal) <sub>3</sub> (GalNAc) <sub>3</sub> (Fuc) <sub>4</sub>           | 10445.869                    | 10445.546                 |
| ApoC-III var 9                                                                                                                                                                                        | ApoC-III + (Gal) <sub>5</sub> (GalNAc) <sub>3</sub> (Fuc) <sub>4</sub>           | 10769.541                    | 10769.108                 |
| Gal – Galactose; GalNAc – N-acetylgalactosamine; NeuAc –N-acetyl neuraminic acid (sialic acid); Fuc - Fucose ; des-A – lacking one alanine (A) residue from the N-terminus of the amino acid sequence |                                                                                  |                              |                           |

**Supplement Figure 1:** Apolipoprotein C-III proteoforms identified with mass spectrometric immunoassay in a m/z range between 8300 and 11000. Shaded in grey are the most abundant apoC-III proteoforms, apoC-III<sub>0a</sub>, apoC-III<sub>0b</sub>, apoC-III<sub>1</sub> and apoC-III<sub>2</sub>, which were analyzed in the study. Also present in the mass spectra are signals from the truncated (des-A) and fucosylated apoC-III proteoforms, as well as a signal from native apoC-II at m/z 8915, that were not utilized in the correlation analyses. Gal – galactose; GalNAc – N-acetylgalactosamine; NeuAc – sialic acid; Fuc – fucose

**Supplemental Figure 2:** Representative mass spectra of apoC-III proteoforms from (1) samples subjected to carb diet intervention: a) converters (pattern A) at baseline (upper panel); b) converters (pattern B) at follow up (lower panel); (2) subjected to weight loss intervention c) (Pattern B) at baseline (upper panel) and (pattern A) at follow up (lower panel). Note the opposite changes in the relative abundance of apoC-III<sub>0a</sub>, apoC-III<sub>0b</sub>, and apoC-III<sub>1</sub> to apoC-III<sub>2</sub> in both interventions.

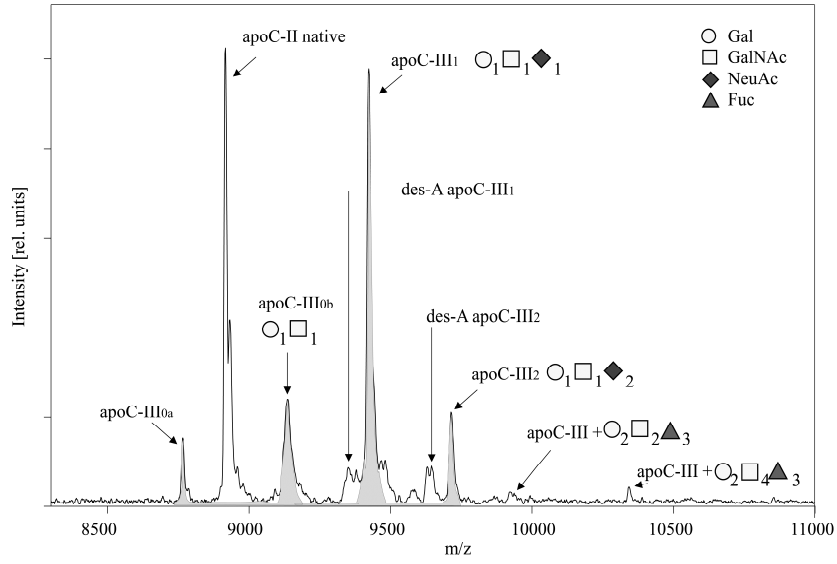

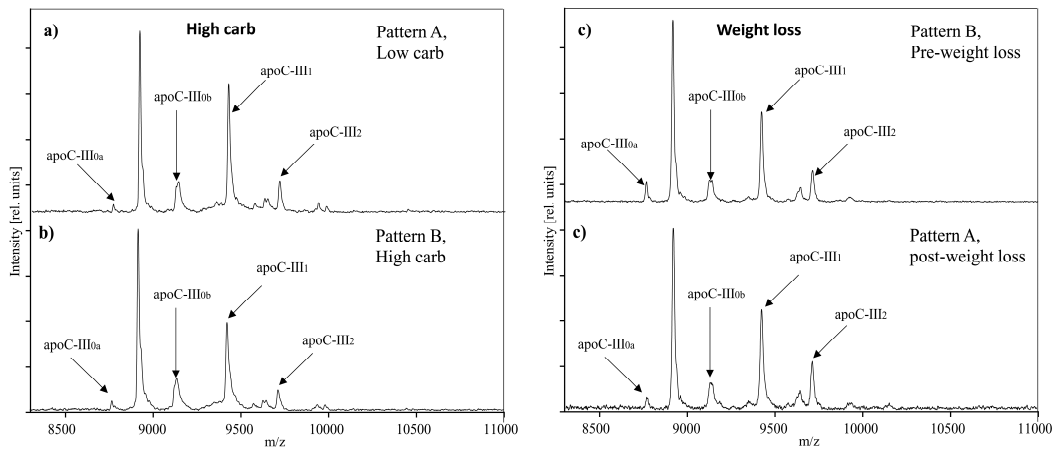

Supplement: NIHMS839582-supplement-01.pdf [file NIHMS839582-supplement-01.pdf]
